# Supplementary material
Source: publisher site journal article supplement (https://www.dovepress.com/get_supplementary_file.php?f=405549.docx)
Supplement: Supplementary file 1 [file get_supplementary_file.php]

**Supplementary Tables**

**Table S1** Characterization of allergen profiles in monosensitization group

| **Allergens** | **0-1 years** | **>1-3 years** | **>3-6 years** | **>6-12 years** | **>12-18 years** | **0-18 years** |
| --- | --- | --- | --- | --- | --- | --- |
| **15 allergens [n (%)]** | | | | | | |
| Cockroach | 2(0.404) | 0(0) | 1(0.202) | 1(0.202) | 0(0) | 0(0) |
| House mite and dust mite | 277(55.96) | 2(0.404) | 25(5.05) | 99(20.00) | 99(20.00) | 52(10.51) |
| Mould-related allergens | 132(26.67) | 2(0.404) | 21(4.24) | 72(14.55) | 28(5.66) | 9(1.82) |
| Cat epithelium | 10(2.02) | 1(0.202) | 1(0.202) | 1(0.202) | 2(0.404) | 5(1.01) |
| Dog epithelium | 1(0.202) | 0(0) | 0(0) | 0(0) | 1(0.202) | 0(0) |
| Artemisia pollen | 20(4.04) | 0(0) | 0(0) | 6(1.21) | 9(1.82) | 5(1.01) |
| Humulus scandens pollen | 17(3.43) | 0(0) | 0(0) | 4(0.808) | 7(1.41) | 6(1.21) |
| Ragweed pollen | 2(0.404) | 0(0) | 0(0) | 1(0.202) | 0(0) | 1(0.202) |
| Mixture of poplar, willow, and elm | 2(0.404) | 0(0) | 0(0) | 0(0) | 1(0.202) | 1(0.202) |
| Milk | 14(2.83) | 2(0.404) | 4(0.808) | 4(0.808) | 2(0.404) | 2(0.404) |
| Egg white | 11(2.22) | 10(2.02) | 1(0.202) | 0(0) | 0(0) | 0(0) |
| Soybeans | 2(0.404) | 1(0.202) | 1(0.202) | 0(0) | 0(0) | 0(0) |
| Peanuts | 0(0) | 0(0) | 0(0) | 0(0) | 0(0) | 0(0) |
| Sea shrimp | 2(0.404) | 0(0) | 0(0) | 0(0) | 2(0.404) | 0(0) |
| Mixture of fish and crab | 3(0.606) | 2(0.404) | 1(0.202) | 0(0) | 0(0) | 0(0) |
| **The five major allergen groupings [n (%)]** | | | | | | |
| Dust mites-related | 2(10.00) | 26(47.27) | 100(53.19) | 99(65.56) | 52(64.20) | 279(56.36) |
| Mould-related | 2(10.00) | 21(38.18) | 72(38.30) | 29(19.21) | 9(11.11) | 132(26.67) |
| Tree and grass pollen-related | 0(0) | 0(0) | 11(5.85) | 16(10.60) | 13(16.05) | 41(8.28) |
| Animal-related | 1(5.00) | 1(1.82) | 1(0.53) | 3(1.99) | 5(6.17) | 11(2.22) |
| Food-related | 15(75.00) | 7(12.73) | 4(2.13) | 4(2.65) | 2(2.47) | 32(6.46) |
| Overall allergen | 20(4.04) | 55(11.11) | 188(37.98) | 151(30.51) | 81(16.36) | 495(100) |

**Table S2** Characterization of allergen profiles in polysensitization group

| **Allergens** | **0-1 years** | **>1-3 years** | **>3-6 years** | **>6-12 years** | **>12-18 years** | **0-18 years** |
| --- | --- | --- | --- | --- | --- | --- |
| **15 allergens [n (%)]** | | | | | | |
| Cockroach | 6(0.51) | 0(0) | 0(0) | 2(0.17) | 2(0.17) | 2(0.17) |
| House mite and dust mite | 332(28.26) | 3(0.26) | 31(2.64) | 103(8.77) | 116(9.87) | 79(6.72) |
| Mould-related allergens | 256(21.79) | 0(0) | 32(2.72) | 109(9.28) | 80(6.81) | 35(2.98) |
| Cat epithelium | 85(7.23) | 3(0.26) | 3(0.26) | 13(1.11) | 42(3.57) | 24(2.04) |
| Dog epithelium | 12(1.02) | 0(0) | 1(0.085) | 3(0.26) | 5(0.43) | 3(0.26) |
| Artemisia pollen | 147(12.51) | 2(0.17) | 16(1.36) | 50(4.26) | 43(3.66) | 36(3.06) |
| Humulus scandens pollen | 135(11.49) | 1(0.085) | 8(0.68) | 36(3.06) | 55(4.68) | 35(2.98) |
| Ragweed pollen | 28(2.38) | 2(0.17) | 3(0.26) | 11(0.94) | 5(0.43) | 7(0.60) |
| Mixture of poplar, willow, and elm | 26(2.21) | 0(0) | 3(0.26) | 9(0.77) | 10(0.85) | 4(0.34) |
| Milk | 44(3.74) | 6(0.51) | 9(0.77) | 13(1.11) | 9(0.77) | 7(0.60) |
| Egg white | 49(4.17) | 9(0.77) | 14(1.19) | 14(1.19) | 9(0.77) | 3(0.26) |
| Soybeans | 19(1.62) | 3(0.26) | 4(0.34) | 7(0.60) | 3(0.26) | 2(0.17) |
| Peanuts | 11(0.94) | 3(0.26) | 1(0.085) | 4(0.34) | 2(0.17) | 1(0.085) |
| Sea shrimp | 16(1.36) | 2(0.17) | 2(0.17) | 4(0.34) | 6(0.51) | 2(0.17) |
| Mixture of fish and crab | 9(0.77) | 1(0.085) | 3(0.26) | 1(0.085) | 4(0.34) | 0(0) |
| **The five major allergen groupings [n (%)]** | | | | | | |
| Dust mites-related | 3(0.26) | 31(2.64) | 105(8.94) | 118(10.04) | 81(6.89) | 338(28.77) |
| Mould-related | 0(0) | 32(2.72) | 109(9.28) | 80(6.81) | 35(2.98) | 256(21.79) |
| Tree and grass pollen-related | 5(0.43) | 30(2.55) | 106(9.02) | 113(9.62) | 82(6.98) | 336(28.60) |
| Animal-related | 3(0.26) | 4(0.34) | 16(1.36) | 47(4.00) | 27(2.30) | 97(8.26) |
| Food-related | 24(2.04) | 33(2.81) | 43(3.66) | 33(2.81) | 15(1.28) | 148(12.60) |
| Overall allergen | 35(2.98) | 130(11.06) | 379(32.26) | 391(33.28) | 240(20.43) | 1175(100) |

**Table S3** Additional details on the intrinsic differences between the monosensitization and polysensitization groups

|  | **Monosensitized children** | **Polysensitized children** | **p-value** |
| --- | --- | --- | --- |
| **Tree and grass pollen-related(Number)** | | | |
| 0-18 years | 41(8.28)(n=495) | 336(28.60)(n=1175) | P<0.001 |
| >3-6 years | 2.57±2.82 | 13.79±26.19 | P=0.010 |
| >6-12 years | 7.73±13.64 | 15.76±29.20 | P=0.149 |
| >12-18 years | 9.92±13.59 | 16.23±33.73 | P=0.753 |
| **Tree and grass pollen-related(IU/ml)** | | | |
| 0-18 years | 7.04±11.84 | 14.37±28.53 | P=0.039 |
| **Artemisia pollen(IU/ml)** | | | |
| 0-18 years | 7.65±12.22 | 21.23±38.25 | P=0.009 |
| **Humulus scandens pollen(IU/ml)** | | | |
| 0-18 years | 7.64±12.81 | 11.81±17.90 | P=0.509 |
| **High levels of house mite and dust mite(Number)** | | | |
| >1-3 years | 10(40)(n=25) | 22(70.97)(n=31) | P=0.02 |
| >3-6 years | 68(68.69)(n=99) | 55(53.40)(n=103) | P=0.026 |
| >6-12 years | 68(68.69)(n=99) | 72(62.07)(n=116) | P=0.310 |
| >12-18 years | 20(38.46)(n=52) | 47(59.49)(n=79) | P=0.018 |
| 0-18 years | 166(59.93)(n=277) | 197(59.34)(n=332) | P=0.882 |
| **High levels of house mite and dust mite(IU/ml)** | | | |
| >1-3 years | 64.71±28.43 | 71.16±56.63 | P=0.714 |
| >3-6 years | 66.31±51.67 | 75.11±62.00 | P=0.257 |
| >6-12 years | 55.78±33.82 | 83.68±60.27 | P=0.002 |
| >12-18 years | 55.48±38.61 | 78.13±67.85 | P=0.311 |
| 0-18 years | 60.59±42.32 | 78.63±61.80 | P=0.009 |
| **High levels of mould-related allergens(Number)** | | | |
| >1-3 years | 2(9.52)(n=21) | 6(18.75)(n=32) | P=0.359 |
| >3-6 years | 13(18.06)(n=72) | 20(18.35)(n=109) | P=0.960 |
| >6-12 years | 7(25.00)(n=28) | 12(15.00)(n=80) | P=0.232 |
| >12-18 years | 2(22.22)(n=9) | 7(20.00)(n=35) | P=0.883 |
| 0-18 years | 24(18.18)(n=132) | 45(17.58)(n=256) | P=0.883 |
| **High levels of mould-related allergens((IU/ml))** | | | |
| >1-3 years | 47.35±18.10 | 52.51±54.77 | P=0.505 |
| >3-6 years | 26.21±7.77 | 45.08±36.61 | P=0.030 |
| >6-12 years | 27.87±8.74 | 45.22±25.34 | P=0.108 |
| >12-18 years | 47.46±4.67 | 43.25±27.14 | P=0.38 |
| 0-18 years | 30.23±11.34 | 45.82±34.45 | P=0.040 |

**Table S4** Characterization of sIgE levels in monosensitized and polysensitized children

| Age Group | The level of sIgE | Monosensitized children | Polysensitized children | p-value |
| --- | --- | --- | --- | --- |
| The sIgE level of house mite and dust mite(Number) | | | | |
| >1-3 years | level 2 | 6(24.00)(n=25) | 5(16.13)(n=31) | P=0.149 |
| level 3 | 9(36.00)(n=25) | 4(12.90)(n=31) | P=0.042 |
| level 4 | 4(16.00)(n=25) | 11(35.48)(n=31) | P=0.102 |
| level 5 | 5(20.00)(n=25) | 6(19.35)(n=31) | P=1.0 |
| level 6 | 1(4.00)(n=25) | 5(16.13)(n=31) | P=0.306 |
| >3-6 years | level 2 | 13(13.13)(n=99) | 18(17.48)(n=103) | P=0.392 |
| level 3 | 18(18.18)(n=99) | 30(29.13)(n=103) | P=0.068 |
| level 4 | 38(38.38)(n=99) | 25(24.27)(n=103) | P=0.030 |
| level 5 | 16(16.16)(n=99) | 18(17.48)(n=103) | P=0.803 |
| level 6 | 14(14.14)(n=99) | 12(11.65)(n=103) | P=0.597 |
| >6-12 years | level 2 | 12(12.12)(n=99) | 14(12.07)(n=116) | P=0.991 |
| level 3 | 19(19.19)(n=99) | 30(25.86)(n=116) | P=0.245 |
| level 4 | 37(37.37)(n=99) | 21(18.10)(n=116) | P=0.002 |
| level 5 | 23(23.23)(n=99) | 29(25.00)(n=116) | P=0.763 |
| level 6 | 8(8.08)(n=99) | 22(18.97)(n=116) | P=0.022 |
| >12-18 years | level 2 | 12(23.08)(n=52) | 12(15.19)(n=79) | P=0.254 |
| level 3 | 20(38.46)(n=52) | 20(25.32)(n=79) | P=0.110 |
| level 4 | 10(19.23)(n=52) | 22(27.85)(n=79) | P=0.261 |
| level 5 | 8(15.38)(n=52) | 12(15.19)(n=79) | P=0.976 |
| level 6 | 2(3.85)(n=52) | 13(16.46)(n=79) | P=0.027 |
| The sIgE level of mould-related allergens(Number) | | | | |
| >1-3 years | level 2 | 12(57.14)(n=21) | 20(62.50)(n=32) | P=0.697 |
| level 3 | 7(33.33)(n=21) | 6(18.75)(n=32) | P=0.227 |
| level 4 | 1(4.76)(n=21) | 4(12.50)(n=32) | P=0.329 |
| level 5 | 1(4.76)(n=21) | 1(3.13)(n=32) | P=1.0 |
| level 6 | 0(0.00)(n=21) | 1(3.13)(n=32) | - |
| >3-6 years | level 2 | 31(43.06)(n=72) | 45(41.28)(n=109) | P=0.813 |
| level 3 | 28(38.89)(n=72) | 44(40.37)(n=109) | P=0.842 |
| level 4 | 15(20.83)(n=72) | 16(14.68)(n=109) | P=0.282 |
| level 5 | 0(0.00)(n=72) | 2(1.83)(n=109) | - |
| level 6 | 0(0.00)(n=72) | 0(0.00)(n=109) | - |
| >6-12 years | level 2 | 6(21.43)(n=28) | 23(28.75)(n=80) | P=0.452 |
| level 3 | 15(53.57)(n=28) | 45(56.25)(n=80) | P=0.806 |
| level 4 | 7(25.00)(n=28) | 8(10.00)(n=80) | P=0.048 |
| level 5 | 0(0.00)(n=28) | 4(5.00)(n=80) | - |
| level 6 | 0(0.00)(n=28) | 0(0.00)(n=80) | - |
| >12-18 years | level 2 | 4(44.44)(n=9) | 15(42.86)(n=35) | P=1.0 |
| level 3 | 3(33.33)(n=9) | 13(37.14)(n=35) | P=1.0 |
| level 4 | 1(11.11)(n=9) | 5(14.29)(n=35) | P=1.0 |
| level 5 | 1(11.11)(n=9) | 2(5.71)(n=35) | P=1.0 |
| level 6 | 0(0.00)(n=9) | 0(0.00)(n=35) | - |

**Supplementary Figures**

**
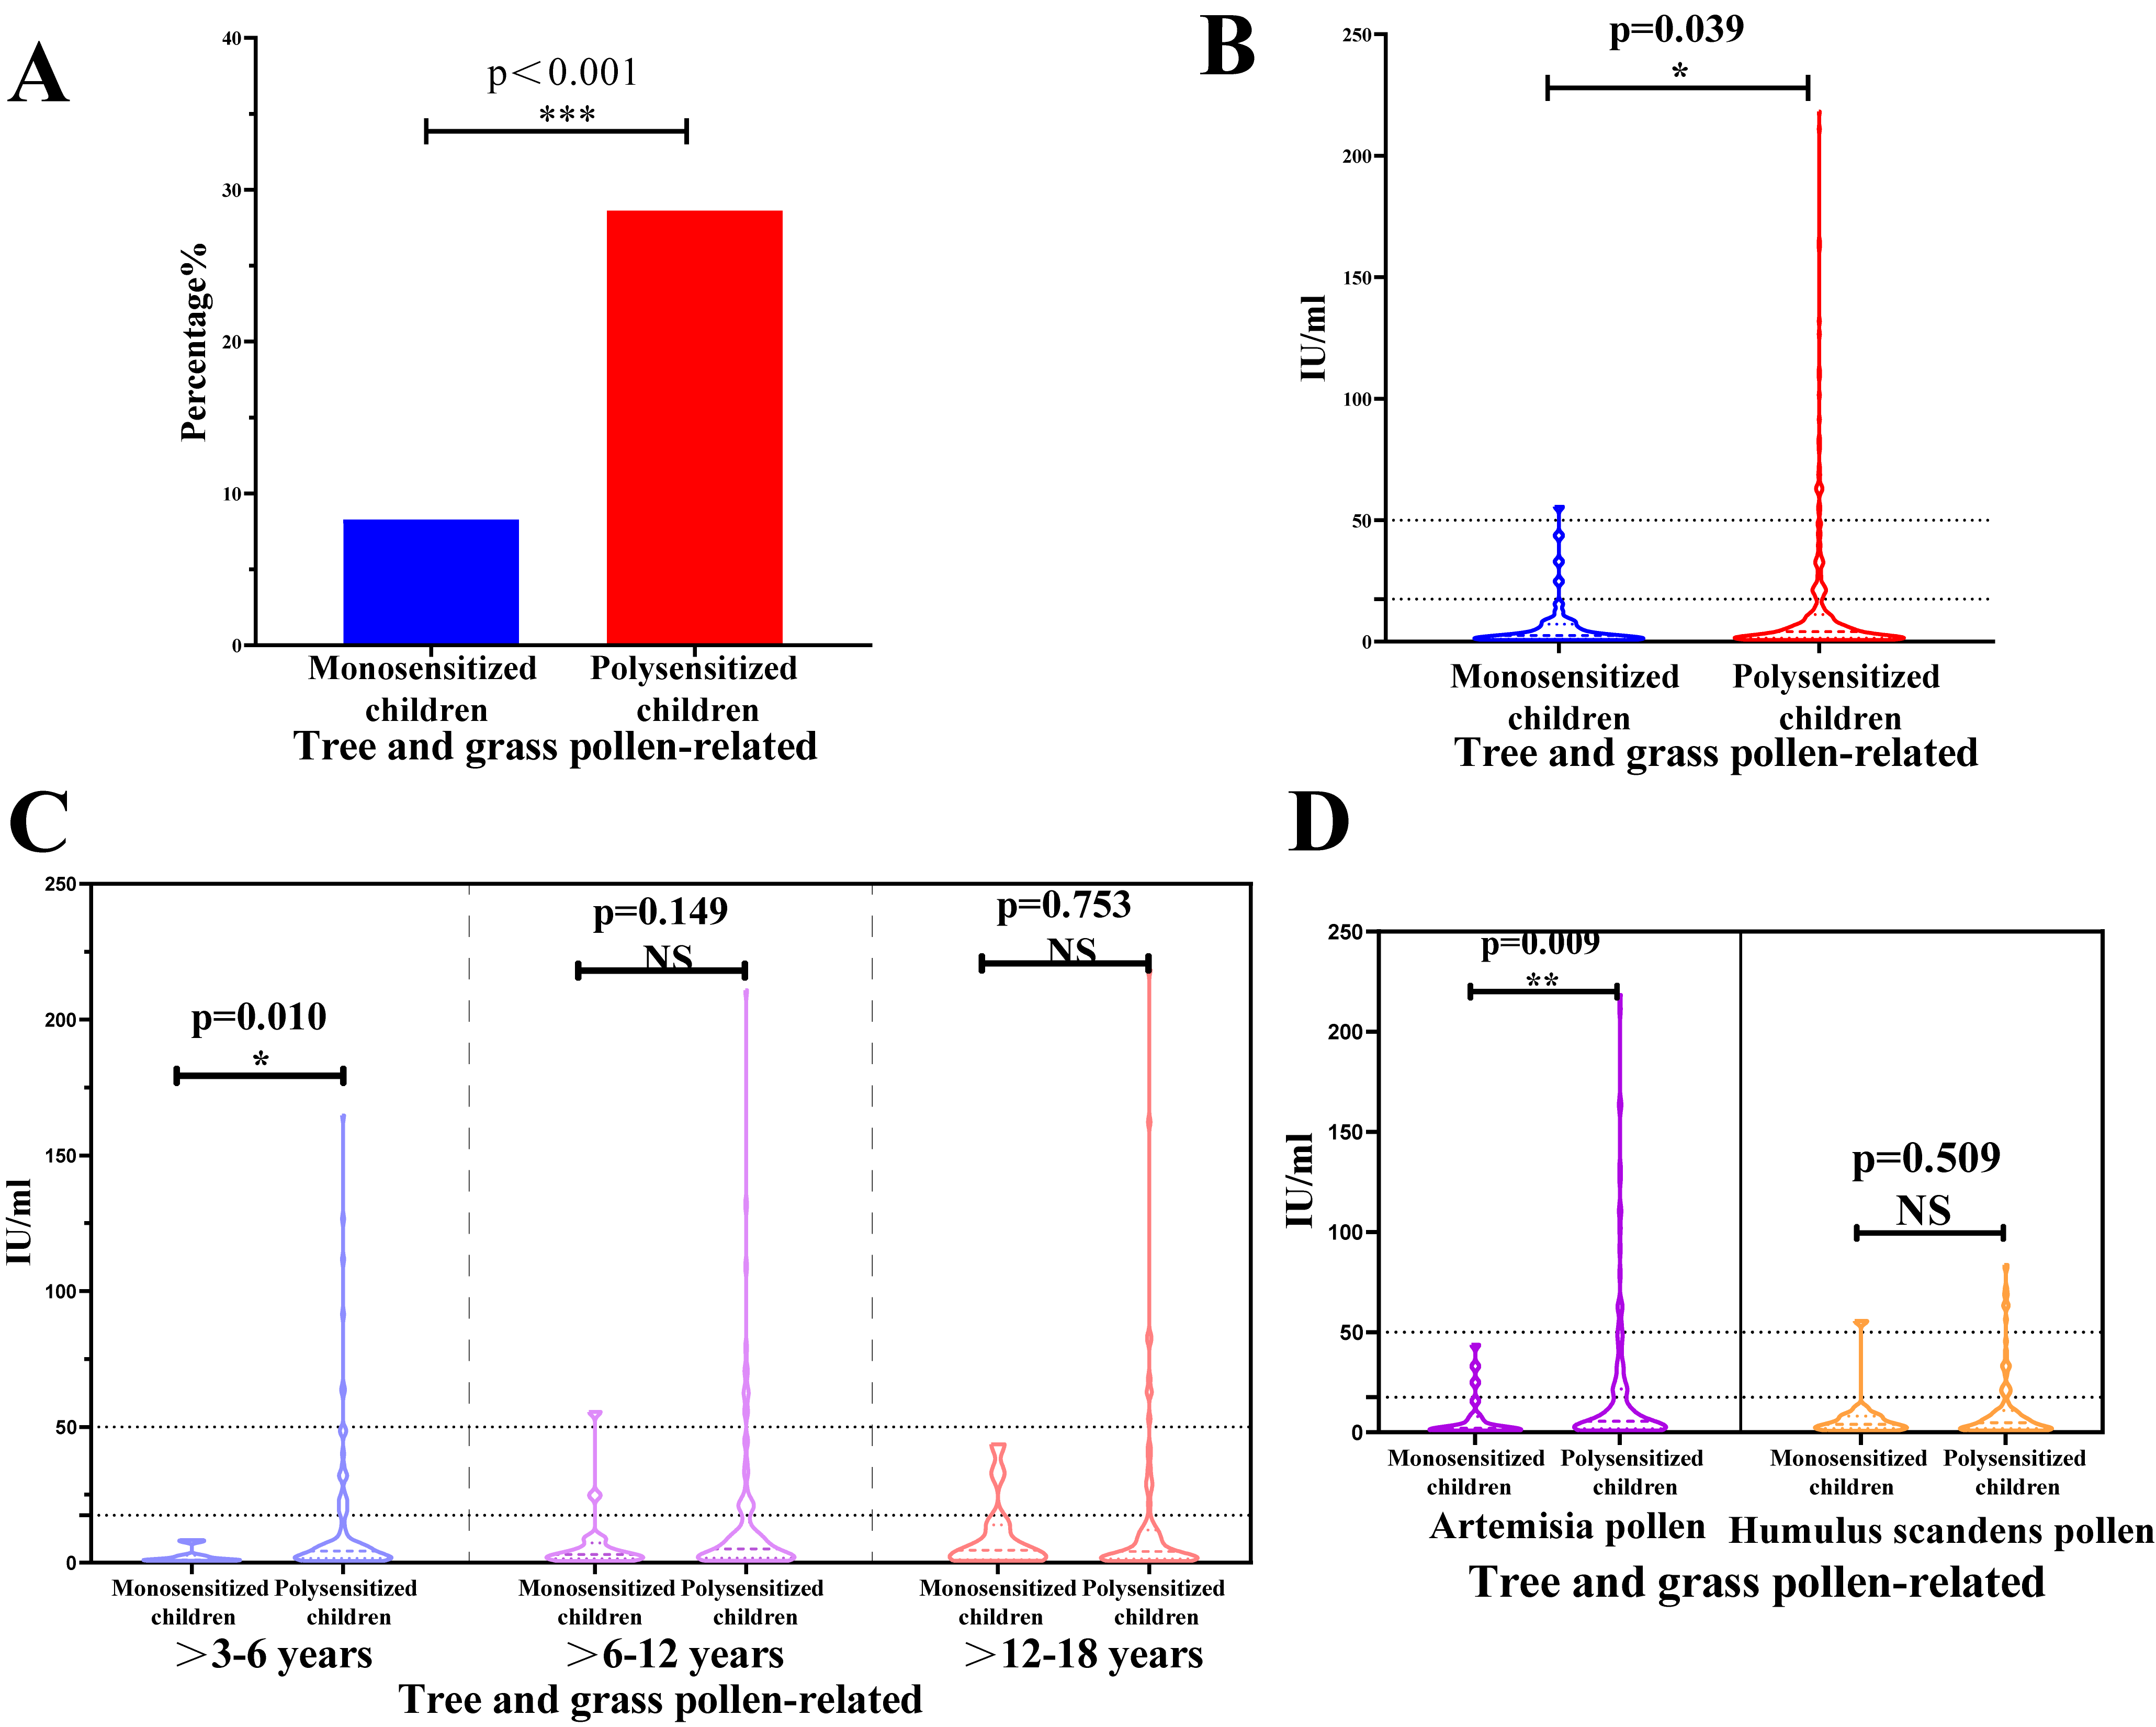
**

**Figure S1** Analysis of differences in tree and grass pollen-related allergens in monosensitized and polysensitized children. A. Analysis of the difference in the proportion of tree and grass pollen-related allergens in monosensitized and polysensitized children. B. Analysis of differences in serum antibody levels to sIgE to tree and grass pollen-related allergens in monosensitized and polysensitized children. C. Analysis of differences in sIgE serum antibody levels to tree and grass pollen-related allergens in monosensitized and polysensitized children in age groupings. D. Analysis of differences in serum antibody levels to sIgE in monosensitized and polysensitized children with Artemisia pollen and Humulus scandens pollen. Significance **p* < 0.05, ***p* < 0.01. NS means no statistical difference.


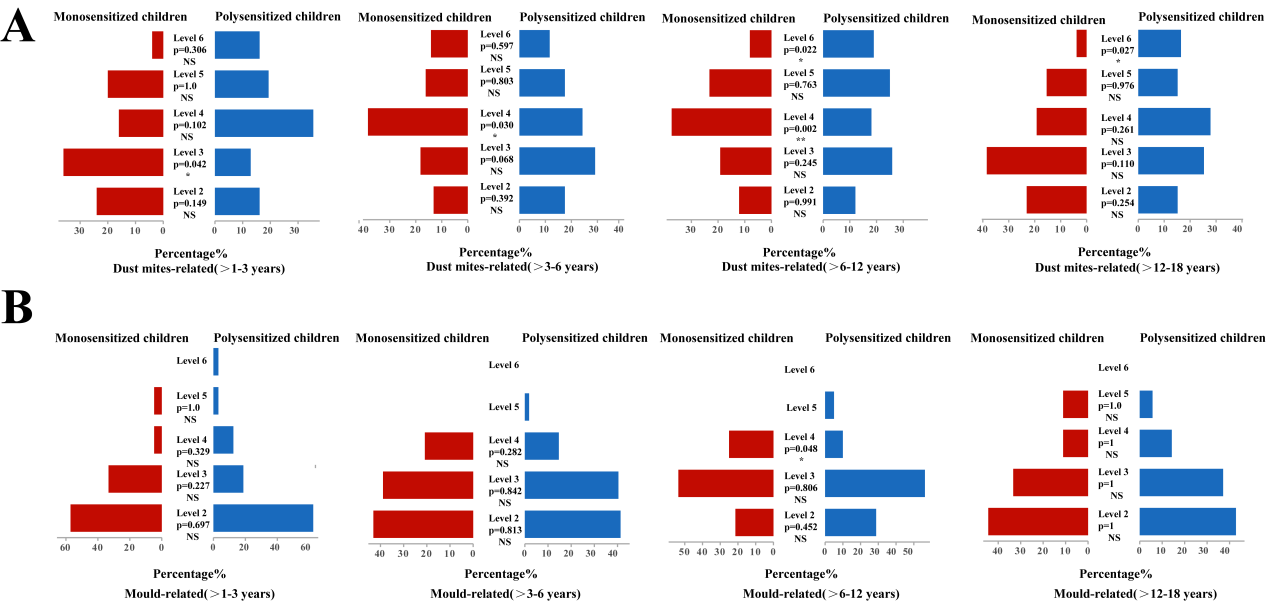


**Figure S2** Characterization of sIgE levels in monosensitized and polysensitized children. A. Dust mite-related allergens. B. Mould-related allergens. Significance **p* < 0.05, ***p* < 0.01, and ****p* < 0.001. NS means no statistical difference.


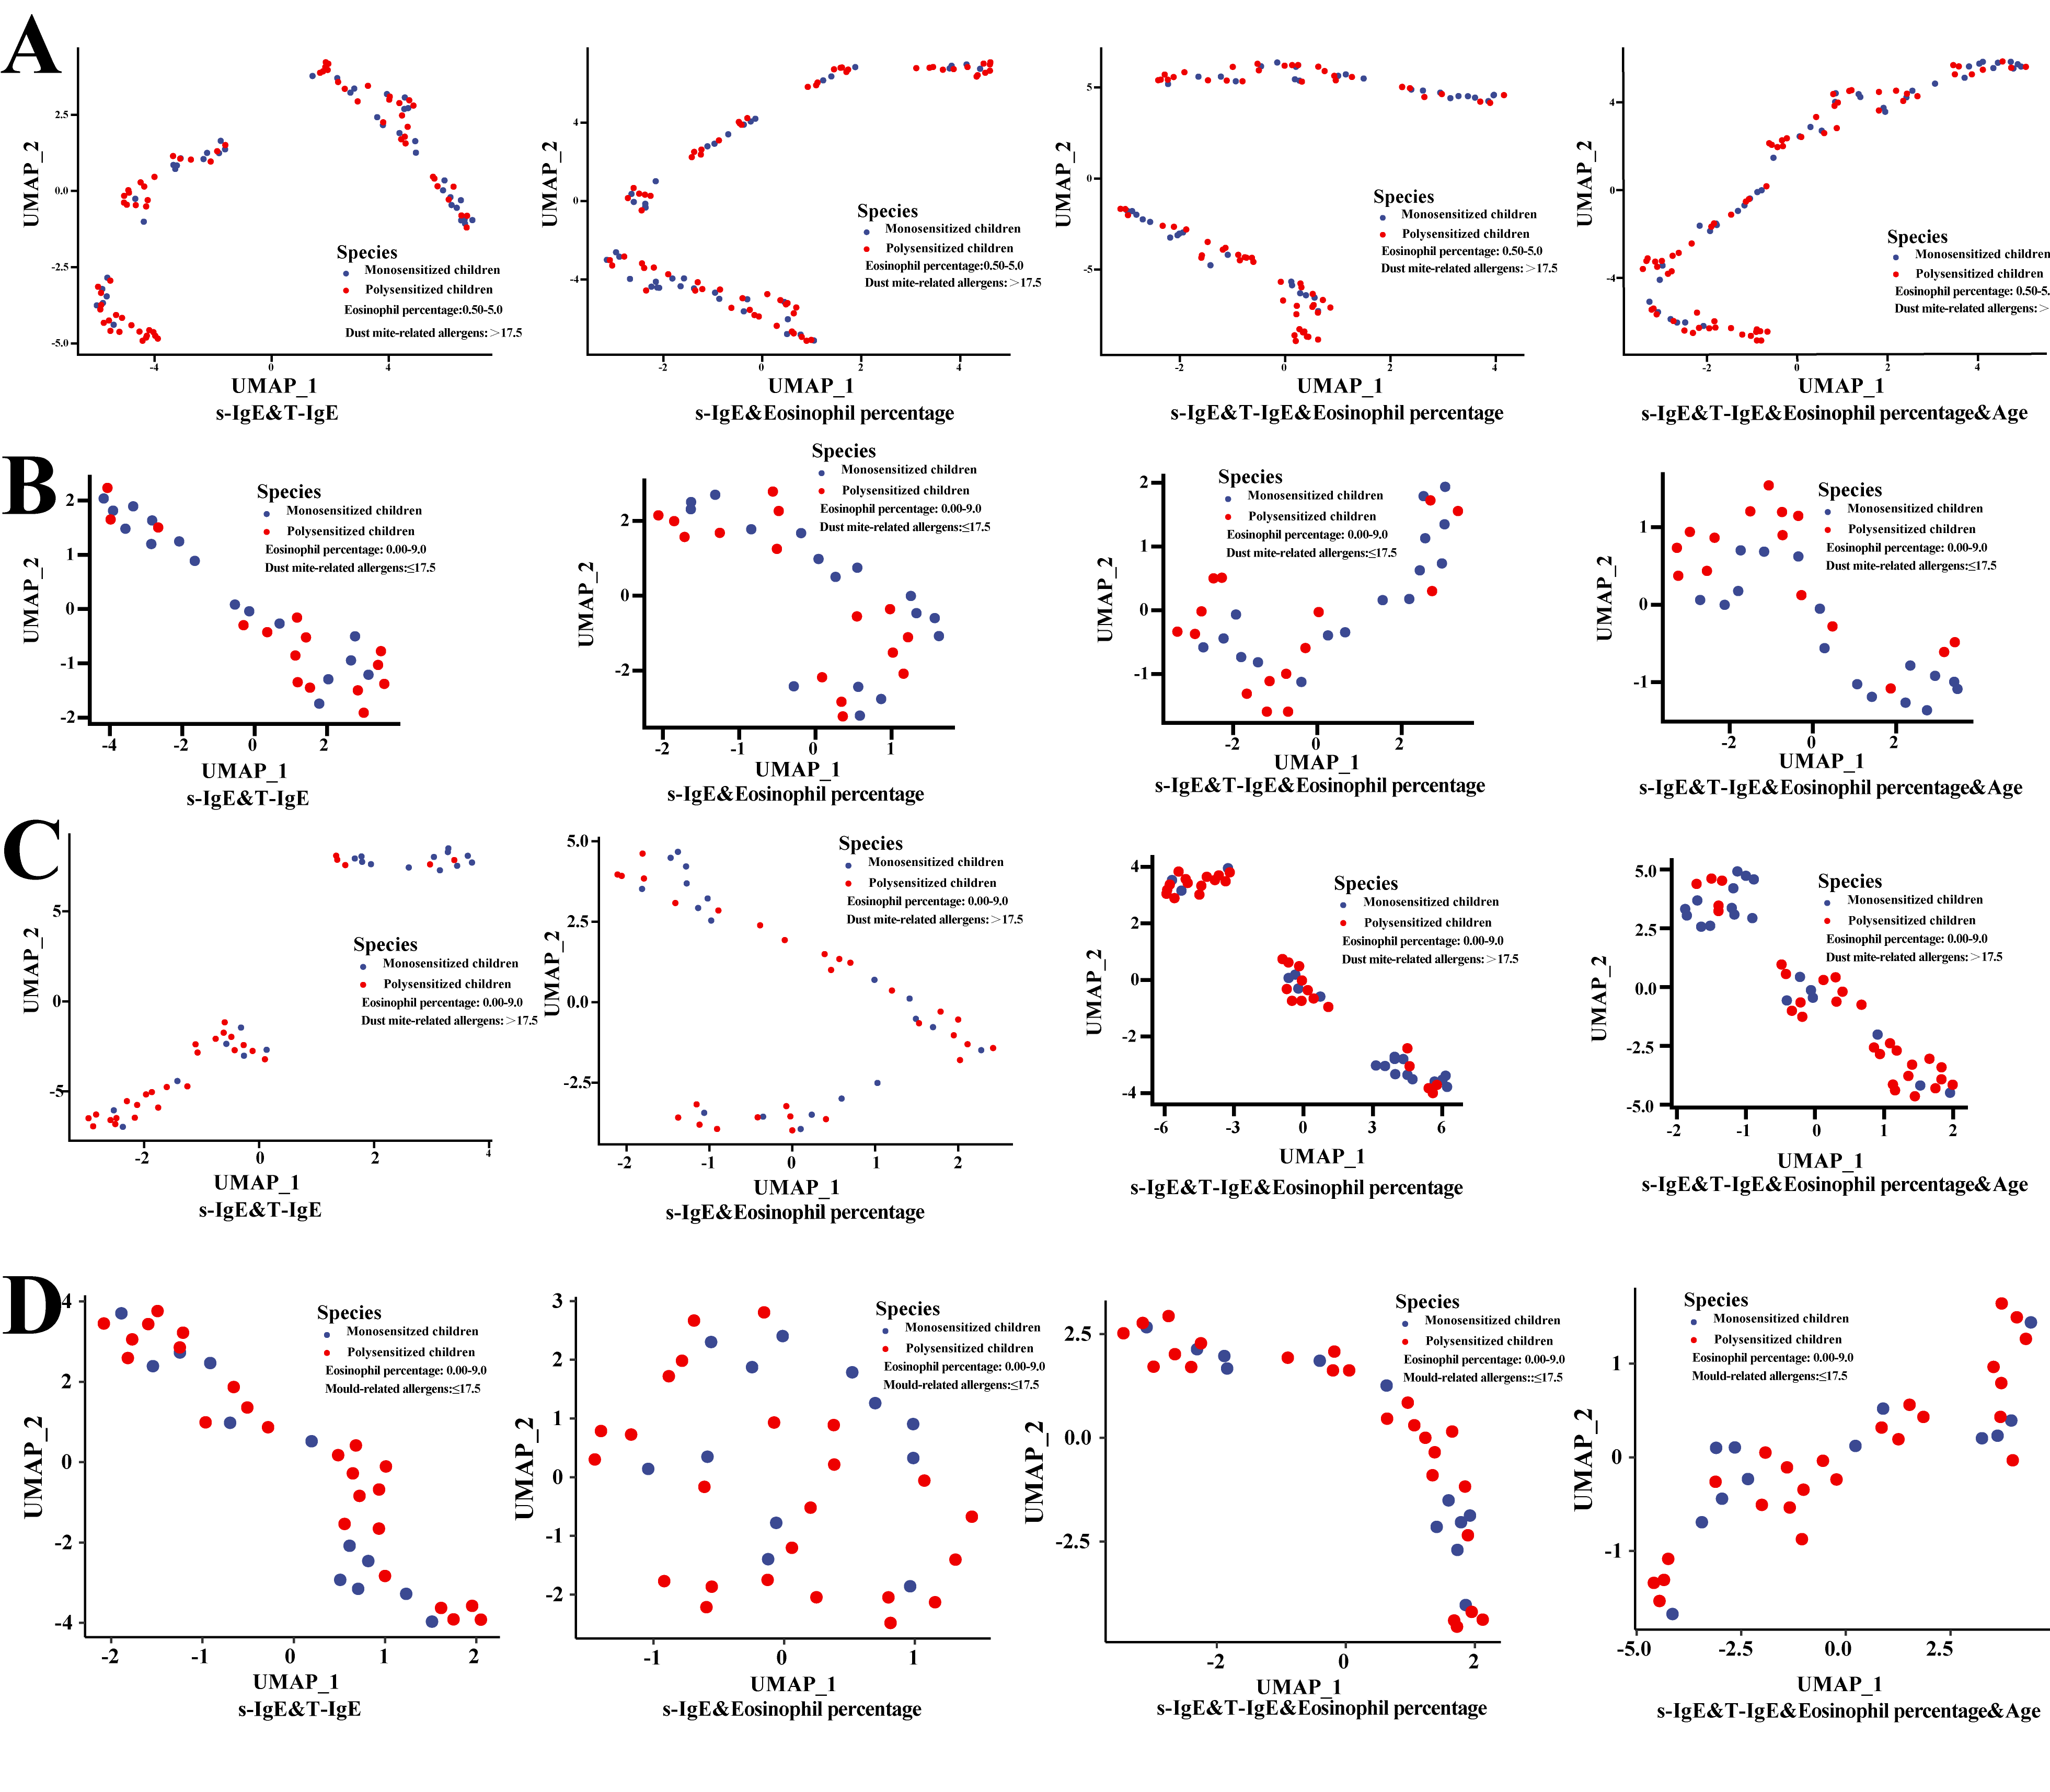


**Figure S3** Dimensional reduction analysis of monosensitized and polysensitized children. A. Dimensional reduction analysis of monosensitized and polysensitized children at high levels of dust mite-related allergens (Eosinophil percentage:0.50-5.0). B. Dimensional reduction analysis of monosensitized and polysensitized children at low levels of dust mite-related allergens (Eosinophil percentage:0.00-9.0). C. Dimensional reduction analysis of monosensitized and polysensitized children at high levels of dust mite-related allergens (Eosinophil percentage:0.00-9.0). D. Dimensional reduction analysis of monosensitized and polysensitized children at low levels of mould-related allergens (Eosinophil percentage:0.00-9.0).
